# Supplementary material for: Hiit vs. Mict for Cardiometabolic Health in Middle-Aged Adults With Metabolic Syndrome: A Randomized Controlled Trial
Source: Research Square preprint supplement (doi:10.21203/rs.3.rs-7199864/v1), 2025-09-01
Supplement: Supplementary file 1 [file b0a35022523eec33ad452526.xlsx]

## Sheet: 三高实验1
ID	Group	Gender	Age	BMI_Pre	BMI_Mid	BMI_Post	SBP_Pre	SBP_Mid	SBP_Post	DBP_Pre	DBP_Mid	DBP_Post	FBG_Pre	FBG_Mid	FBG_Post	HbA1c_Pre	HbA1c_Mid	HbA1c_Post	TG_Pre	TG_Mid	TG_Post	HDL_C_Pre	HDL_C_Mid	HDL_C_Post	LDL_C_Pre	LDL_C_Mid	LDL_C_Post	ALT_Pre	ALT_Mid	ALT_Post	UA_Pre	UA_Mid	UA_Post	hs_CRP_Pre	hs_CRP_Mid	hs_CRP_Post	HR_Recovery_Pre	HR_Recovery_Mid	HR_Recovery_Post
P001	HIIT	男	51	26.6	24.4	28	143.5	151.4	123.3	76.6	85.9	80.1	6.1	5.5	5.7	6.6	5.4	5.7	2.5	1.4	0.9	1.2	0.4	0.2	4.1	3.4	3.4	55.7	26.6	34	496.9	420.4	459	2	4.1	3.5	21.6	16.5	10.2
P002	HIIT	女	64	29.2	27.6	34.7	150.9	140.5	143.1	94.3	92.5	103	9.6	5.7	6.2	6.8	7.1	5.8	2.4	2.2	2.1	1.1	0.2	0.3	3.6	3.6	2.4	25.8	31.4	40	453.5	362.3	444.3	2.8	5.4	4.6	18.8	19.7	10.8
P003	HIIT	男	59	30.1	25.4	28.1	147.8	146.7	131	84.7	95.6	96.5	7.5	6.5	6.2	6.9	6	5	2.1	1.6	1.5	1.3	0.6	0.3	4.2	3.3	3.3	9.7	15.6	19.6	353.3	395.1	469.3	3.4	2.2	0.9	14.2	16.1	13.1
P004	HIIT	女	55	29.9	28.4	29.3	138.8	144.6	150.7	94.6	82.1	99.2	7.2	6.7	7.6	5.4	6.5	4.8	2.1	1.3	1	1.1	0.4	0.6	3.1	4.1	3	32.1	36.6	11	434.8	460.7	382	2.1	1.6	0.6	14.1	15.6	13.6
P005	HIIT	男	52	26.3	25.7	28.9	142.9	145.5	147.7	83.9	96.5	94.8	6.1	8.1	5.9	6.6	6.3	6.9	2.2	2	2.3	1	0.3	0.1	3.9	3	2.5	46	34.5	28.5	449.9	425.9	385.5	2.6	3.3	4.4	17.2	14.1	11.9
P006	HIIT	女	51	27.4	30.6	28.3	140.1	136.8	134.6	75.6	100.3	80	7.7	5.5	6.3	6.3	6.6	5.2	2.1	1.3	0.9	0.8	0.1	0.2	4.8	3.4	3.7	54.6	26.3	21.8	488.4	454.6	353	2.5	3.7	2.9	17.9	21.8	9.8
P007	HIIT	男	63	28.7	25.9	26.4	139.1	144.7	138.9	77	92.8	84.8	6.4	7.5	6.6	6.1	6.4	5.1	2.7	1.7	1.6	1	0.5	0.1	3.3	2.9	2.2	22.7	41.1	28.9	514.8	538.1	445.4	3.7	2.8	1.6	16.8	12.2	13.2
P008	HIIT	女	55	30	26.9	28.5	153.5	149.5	133.4	90.4	104.5	92.9	7.1	6.3	6.2	6.6	5.4	4.3	3.3	1.7	1.3	0.8	0.9	0.2	3.5	2.6	3.3	40	43.9	32.5	359.1	325.6	465.7	3.6	4.5	3	17.2	21.6	15.7
P009	HIIT	男	55	27	29.1	25.5	148.6	159	143.4	92.1	83.3	79.2	9.6	6.5	5.6	8.1	7	5.4	1.9	2.2	1.9	0.9	0.8	0.3	4.1	3	3.3	30.3	18.4	29.5	371.3	516.5	446.5	2.8	1.7	0.1	22.8	17.5	17.4
P010	HIIT	女	48	27.6	25	26.5	138.1	154.1	153.6	82.8	79.5	94.7	6.9	7.2	6.2	7.2	6	4.9	1.5	1.9	2	1.1	0.4	0.3	3.9	3.3	2.5	33.9	26.9	48.5	344.5	425.8	519.5	3.7	3.7	2.5	20.3	9.9	12.8
P011	HIIT	男	52	25.8	28	26	154	166	134.1	95.1	75.3	87.1	8.1	5.4	7.1	6.4	5.2	6.9	2.2	1.7	1.2	1.3	0.4	0.2	4	3.1	3.5	61.4	26.8	37.3	406	365.6	418.7	3	2.4	2.8	16.8	17	13.3
P012	HIIT	女	47	25.6	30.1	27.2	148.1	136.8	149	76.7	101.5	86	6.3	6.9	5	7.2	6	6.5	3.5	2.1	0.8	1.1	0.6	0.1	4	3	2.7	20	25.1	37	448	339.7	459.1	3.2	4.7	3.4	19.8	7.1	11.3
P013	HIIT	男	46	29.6	24.3	31.6	153.1	153.2	138.7	89.5	94.7	94.7	7	6.7	6.1	7.8	7.4	5.3	1.8	2.4	1.4	0.8	0.3	0.4	4.1	2.6	2.9	37.5	42.8	40.2	479.2	408.2	353.5	5.2	5	1.5	11.9	18	14.9
P014	HIIT	女	56	30.7	27.9	23.3	151.3	146.3	136.1	80.3	89.1	92.6	8.8	7	5.3	7.4	6.9	7.4	3	2	0.9	1.1	0.6	0.2	4.4	3.3	2.9	39.7	32.6	22.6	415.4	474.8	395.8	4.8	2.2	2.6	17.6	19	11.6
P015	HIIT	男	50	27.9	28	28.4	136.7	166.4	142.9	84.8	91.7	86.1	6.4	6.8	7.2	6.8	6.1	6.5	3	1.7	2.2	1.2	0.7	0.1	4	2.5	2.7	45.9	31.9	44.4	400.8	411.8	460.7	2.2	2.5	1.6	23.2	13.1	17.3
P016	HIIT	女	46	30	29.1	23.8	139.4	136.4	133.6	90.4	80.5	98.3	8.8	9	4.5	6.3	6.1	5.6	1.9	1	1.3	0.9	0.7	0.3	3.7	3.7	3.2	36	14.5	33.2	429.1	510.2	469.9	4.3	3.9	2.8	15.1	16	7.9
P017	HIIT	男	45	28.7	25	26.1	152.5	136.1	138.5	83.1	109.1	80.4	7.7	5.9	5.4	7.3	6.1	4.1	2.5	1.2	1	1	0.5	0.3	4.1	3.3	3.2	38.1	40.9	40.7	369.9	332.4	401.4	4.3	2.6	1.6	12.6	23.3	13.6
P018	HIIT	女	56	26.7	24.9	29.2	151.1	138.5	132	86.9	90.5	93.9	6.4	6	6.4	7.1	7.8	7.4	3	1.5	1.3	1	0.5	0.2	4.7	2.6	1.9	31.1	22.1	23.3	545.4	418.8	414.7	2.4	3	2.1	13.4	13.5	16.2
P019	HIIT	男	56	28.7	28.5	27.1	144.8	123.3	163.6	98.1	90.4	93.7	7.6	5.9	7.6	7.4	6.6	4.8	2	1.4	0.5	0.8	0.3	0.1	3.7	3.1	3.5	37.7	35.1	18.5	323.5	344.4	327.9	4.3	3	1.5	11.6	11.3	15.7
P020	HIIT	女	61	31.1	28.1	24.8	146.2	139.2	144.4	85.4	95.3	86.5	8	5.9	5.9	7.2	6.6	4.6	2.1	1.6	0.7	1.1	0.3	0.2	3.3	2.9	2	31.6	37.3	42.2	431.1	441.3	397.6	5	1.1	3.2	12.9	21.4	25.8
P021	HIIT	男	54	27.9	28	25.6	157.8	136.9	137	96.7	93.3	91.6	7.6	5.9	5.4	7.5	7	6.5	1.9	1.7	1.8	1	0.5	0.1	4.4	3.5	3.3	41.2	48.1	37.8	541.4	472.7	472.4	2.4	3	3.4	14.5	23.4	16.4
P022	HIIT	女	60	31.1	28.2	28.4	139.1	146	146.1	81	91.3	79	5.4	7.7	7.9	6.4	6.5	7.5	1.7	2	0.9	1.1	0.6	0.2	3.7	4	3.4	31.3	21.4	25	420.4	394.3	453.5	2.6	2.3	2.3	10.4	15.5	11
P023	HIIT	男	59	22.8	26.1	25.5	150.5	147.9	142.9	94.2	83.2	96.4	6.3	7.9	4.6	7.7	6.1	6.8	1.9	1.7	0.7	0.8	0.7	0.1	2.7	2.4	2.3	38.8	4.3	25.3	408.6	263.2	449	4.5	2.5	2.5	16.1	19.5	14.6
P024	HIIT	女	59	29.6	28	27.4	143	163.3	141.8	101.5	93.3	87.5	6.8	5.9	3.8	6.9	6.2	6.2	1.6	1.9	1.5	0.9	0.3	0.1	4.2	3.4	2.6	34.7	36.3	45.3	398.6	431.4	422	3.8	4.4	1.1	19.6	20.9	7.9
P025	HIIT	男	63	28.2	28.1	27.1	142.8	154	150.1	70.2	104.6	84.8	6.9	5.7	6.4	8.3	6.2	6.2	2.2	1.7	1.8	1.1	0.8	0.2	3.5	3.2	2.2	46.3	52.5	22.1	409.2	445.7	419.4	4.1	1.7	2.2	12.4	12.5	14.7
P026	HIIT	女	56	27.4	26.1	25.7	156	138.7	151.6	83.6	100.3	97.4	7.6	7	5.5	6.3	6.3	6.4	1.8	0.7	1.6	0.9	0.4	0.1	3.8	3.6	2.7	34.5	46.9	50.4	502.4	443.8	379.4	3.8	3.8	2.4	22.1	13.6	11.7
P027	MICT	男	64	28.2	31.4	31.8	153.3	135.7	139.2	94.6	102.4	83.9	7.2	6.1	5.5	8	7	6.8	2.3	1.4	2.2	1.3	0.7	0.9	4	3.6	3.1	17.3	36.8	25.5	287.3	493.8	461.4	3.9	2.9	5.6	18	20.6	19.2
P028	MICT	女	47	24	28.6	28.8	153.1	149.6	138.7	88.4	85.6	78.2	5.7	7.3	7.2	6.9	6.5	6.5	1.4	1.8	1.3	0.9	0.6	0.3	3.9	3.1	3.7	47.6	29.8	40.9	512	355.4	444.8	2.2	2.9	1.9	20.1	22.4	13.3
P029	MICT	男	49	27.6	25.3	23.4	158.1	131.5	141.7	93	81.8	77	7.4	6.9	6.7	6.3	7	6.4	2.4	1.3	1	1	0.2	0.5	4.2	3.3	4	25.9	42.8	31.2	334.6	460.5	449	4.5	4	4.5	13.4	18	15
P030	MICT	女	63	28.7	29	27.9	145.2	163	121.5	85.2	88.7	94.3	7.6	5.2	5.9	6.5	6.4	6.3	2.6	2.2	2.5	1.2	0.9	0.8	3.6	3.1	4	28.5	25	40.5	404	491.3	387.9	4.7	3.5	4	19.4	12.2	13
P031	MICT	男	51	31	25.8	26.2	151.8	156.5	129.3	90.7	90.1	79.3	7.6	8.2	5.2	6.6	6.6	5.8	1.2	2.7	1.5	0.7	0.8	0.5	4.1	4	3	29	39.5	29.1	394.2	313	290.3	3.3	3.8	3.3	11.6	23.6	22.5
P032	MICT	女	53	27	29.3	29.2	141.9	140	158.2	88.8	98.5	103.5	8.1	8.5	7.4	7.1	5.1	6.1	2.4	2.5	1.6	0.6	0.6	0.6	3.7	3.5	3.2	48.7	39.8	32.9	455.3	438.9	485.3	3.5	4.2	4.8	19.6	13.6	14.2
P033	MICT	男	51	26.4	30	25.9	148.2	127.6	160.9	99.3	76.2	72.8	7.8	6.1	7.2	7.2	7.1	5.1	2.8	1.8	2.4	0.7	0.7	0.3	4.2	4.5	2.5	13.6	45.3	34.9	324.1	389.4	390.8	2	2.9	3.4	16.7	14.4	22.8
P034	MICT	女	62	27	26.1	27.3	143.7	158.2	142	92	101.9	103.1	7.5	6.3	6.4	6.4	6.7	6.2	1.6	2.6	2	1.3	0.8	0.6	4.1	3.5	2.9	66.4	62.3	24.5	447.7	414.8	367.7	4	2.6	3.4	18.2	17.1	18.8
P035	MICT	男	48	29.8	29.6	28.5	146	143.6	150.3	92.7	88.4	91.2	6.9	7	8.3	6.8	7.2	5.6	3	2	1.9	0.9	0.4	0.5	3.3	3.1	3.8	45.6	38.6	41.9	541.5	440.6	461.1	4.1	2.1	2.9	11.3	21.9	17.4
P036	MICT	女	58	28.7	28.5	29.2	151	157.1	147.6	86.7	86.3	88.7	5.3	7	5.4	8.3	4.5	5.5	2.4	1.7	2.8	1.5	0.6	0.7	4.3	2.7	4.1	37.2	29.6	29.4	338.2	390.5	396	3.4	2.4	4.2	12.4	19.1	17
P037	MICT	男	62	26.9	29.3	25.1	136.8	128.8	175.3	86.1	81.6	85.1	7.4	7.4	5	8	8	6.4	1.8	1.6	1.4	0.9	0.9	0.7	3.5	2.6	2.7	34.5	34.4	32.2	431.4	379.2	483.1	4.6	6.1	4.1	18.4	17.4	17.1
P038	MICT	女	53	29	31.5	26.8	165.9	138.7	155.7	86.5	76.5	92.7	7.2	8.7	5.8	7.1	6.4	7.3	2.2	1.7	2.2	1	0.4	1	4.2	2.7	3	37.9	17	24.6	380.3	421.7	456.5	3.2	4.4	2.4	12.2	17.6	7.8
P039	MICT	男	46	28.2	27.2	26.6	134.9	144.8	143.2	93.2	96.3	89.2	7.3	6.5	6.5	6.8	7.3	6.9	2.5	1.7	1.7	1.3	0.8	0.6	4	3.6	3.3	40.2	27.8	8.9	445.6	354.5	460.5	4.1	1.8	1.7	17.9	15.9	14.4
P040	MICT	女	64	29.9	26.2	26.2	132.9	145.2	134.9	86.6	90.3	98.3	5.7	5.9	6.7	6.9	5.8	5.2	2.2	2	1.8	1.4	0.4	0.6	4.7	3.8	3.4	41.5	30.6	32.6	421.1	354.6	337.5	2.5	1.9	2.8	10.5	17.9	18.9
P041	MICT	男	59	26.6	25.9	31	156.6	140.2	128.4	92.3	79.4	90.4	5.9	5.3	6.3	7.2	6.9	5.6	2.5	2	2.5	1.4	0.8	0.5	3.7	2.7	2.9	40.6	29.5	58.6	381.5	460.5	492.2	3.5	3.7	2.2	19.4	5.6	15.3
P042	MICT	女	51	27.3	26.1	28.3	152.9	150.9	146.5	106.6	79.3	90.7	8.1	6	6.9	6.1	5.8	7	1.7	1.9	2	1.2	0.7	0.4	3.6	3.9	3.5	35.9	36.2	42.3	449.3	350.8	435.2	3.3	3.7	2.9	11.1	14.5	9.9
P043	MICT	男	56	27.2	27.5	25	151.2	134	136.9	97	87	86.6	7	6.7	5.2	6.6	6.1	5.6	2.3	2.1	2	1.2	0.4	0.6	3.8	3.3	3.1	33	26.5	34.3	528.3	459.7	397.3	3.7	3.7	4.2	18.2	16.7	15.3
P044	MICT	女	52	25.1	28.4	29.3	151.3	143.3	130.3	87.4	103.1	89	7.7	8.5	7.9	5.6	7.8	6.1	1.5	2.5	2.2	1.1	0.9	0.4	3.6	3.6	3.3	33.5	45.9	31.9	408.5	447.5	428.1	3.1	2.9	2.5	18.5	11.1	22.3
P045	MICT	男	59	28.6	28.3	31.7	144.9	145.9	138	99.6	87.6	92	7	6.2	6.4	7.1	6.4	6.7	2.1	2.4	1.5	1.2	0.6	0.5	4.2	4.3	3.6	33.1	34.7	34.7	463.2	316.2	312.9	3.4	3.1	3	13.2	17.2	20.5
P046	MICT	女	47	28.5	29.4	29.6	136	149.8	133.7	86.7	77.7	75.8	7	6.9	7.6	7.3	6.7	5.6	1.7	1.2	1.3	0.9	0.5	0.8	3	3.9	3.3	46.3	34.6	40	342.4	379	444	4.3	3.5	3.1	18.3	14.9	15.3
P047	MICT	男	58	28	27.7	24.5	145.8	151.8	161.4	73.7	87.7	78.7	7.9	6.7	6.8	6.5	7.1	6.4	1.8	0.6	1.2	0.8	0.7	0.3	3.3	3.4	3.1	40.9	31.4	22.7	362.6	491.3	357.7	3.1	3.3	3.8	17	22.7	19.3
P048	MICT	女	61	27.5	30.6	26.5	138.2	133.5	153.3	81.9	87.5	95.4	6.5	7.9	7	7.9	6.8	5.4	2.8	2.4	0.7	1	0.9	0.7	3.3	3.1	3.2	5.6	36.3	45.6	448.3	360.8	338.3	1.9	1	0.8	13.8	22	14
P049	MICT	男	48	25.2	27.2	30	154.8	129.4	144.4	75	68.1	90.9	7.1	9.2	7.1	5.9	6.6	5.9	2.7	1.2	2.7	1	0.5	0.8	4.3	2.4	3.3	41.6	43	41.7	509	391.8	328.2	5.2	3	2.4	12	13.8	8.7
P050	MICT	女	62	27.2	33.1	26.1	143.5	157.5	159.3	87.2	89.3	88	6.5	6.2	6.9	5.8	6.8	6.5	2.5	1.8	1.1	0.9	0.7	0.5	4.7	3.1	3.1	36.9	26	41.7	441.3	447.4	486.3	4.9	2.3	3.2	8.1	15.1	11.8
P051	MICT	男	52	27.3	29	28.4	136.7	148	145.3	90.1	87.9	89.6	6.6	6.2	7.1	7	8.2	5.2	1.7	1.3	1.6	1.1	0.8	0.1	3.7	3.4	3.2	34.8	28.1	38.9	401.2	466.7	381.7	2.2	3.4	4.2	17.4	15.4	21.8
P052	MICT	女	48	26.4	26	29	141.8	137.2	135.9	103.4	95.3	92.3	6.7	7.7	7.8	7.5	6.5	6.6	2	1	1.6	1.2	0.8	0.4	3.7	3	4.1	31.1	31.7	34.7	420	404.6	511.5	4.2	6.2	2.5	9.7	13.9	14.4
P053	CON	男	46	27.7	25.9	26	149.1	160.5	160.1	92.6	104.8	85.6	7.2	7.7	7.1	8	6.9	6.7	2.8	2.5	2.3	1	1	1.2	3.8	3.7	4	46.2	21.5	41.6	345	384.1	387.8	3	3.9	1.5	16.4	16.8	14.9
P054	CON	女	50	28.8	29	27.8	139.4	146.2	150.3	88.2	99	83.7	6.5	8.8	7.6	6.5	7.5	7.1	2.3	2.6	2.5	1.3	0.9	0.9	4.4	3.8	3.6	44.5	26.8	40.8	456.3	505.3	317.5	3.8	3.2	4	14.9	13	14.7
P055	CON	男	54	31.8	27.6	21.4	136.8	156.8	134.5	96.6	87.8	91.5	8.3	7.6	6.8	7.6	7.6	6.9	3.4	1.9	2.5	0.8	0.8	0.7	3.3	3.7	4	27.3	30.2	31.4	472.9	524.3	352.9	3.8	4.4	2.8	18.7	11.5	23.5
P056	CON	女	48	28.3	29.4	25.9	147.4	145.7	143	72.3	81.1	82.1	6.1	6.6	8.3	6.8	7.6	7.7	2.4	0.9	1.8	1	1	0.8	3.9	3.5	3.5	39.1	43.7	29.2	392.9	478.7	494	3.3	4	2.2	14.8	18.5	22.4
P057	CON	男	62	28.5	28.9	27.4	147.4	165.6	136.1	91.9	110.6	93.2	6.8	7.6	6.2	6.7	7.2	6.8	2.3	1.9	2	0.9	0.8	1.1	4.3	3.9	4.3	25.3	37.6	35.9	391.8	425.1	410.5	2.7	3.9	2.8	14.7	18.5	24.8
P058	CON	女	56	27.9	27.9	25.4	139.9	162.6	131.1	96.2	90.5	76.3	6.6	8.1	8.7	7.4	6	6.4	2	2.4	2.2	0.6	0.4	1	4.1	4	3.9	21.2	36.9	50.4	436	371.5	387	2.8	4.1	3.2	18.9	12.8	15.3
P059	CON	男	46	24.2	26.3	31.2	140.3	142.5	154.2	78.2	90.1	98.1	8.4	7.8	6.9	7.3	7.9	6.8	2.3	1.5	2	1	1.1	0.9	3.9	3.3	3.6	28.7	43.5	22.5	393.8	370.2	429.5	2.6	5.6	2.8	17.3	19.6	17.1
P060	CON	女	54	27.9	25	25	147.3	154.7	164	99.2	89.8	93.7	7.2	7.5	5.5	5.7	6	7.1	2.1	2.3	2.9	1	1.2	0.8	4.3	4.5	3.9	43.6	33.6	20.2	416	451.4	450	2.7	2.4	1.2	17.3	13.5	9.8
P061	CON	男	48	28.1	27.1	27	130.5	151.5	130.9	92.7	91.6	91.9	8	8.1	7	7.8	7	6.7	2.6	2.2	2.3	1.3	0.5	0.8	2.4	3.8	2.9	44.5	38.9	36.5	546	445.1	486.9	3.4	4	4.3	17.9	17	21.8
P062	CON	女	58	32.9	29.7	28.2	130.9	158.7	150.5	86.7	88.8	97.8	5.5	8.2	6.2	7.8	6.3	6.7	2.7	2.5	2.5	1.1	0.8	0.7	4.1	3.8	3.1	40.1	34	35.4	405.2	504.1	506.8	2.8	2.6	4.7	9.9	19.3	11.2
P063	CON	男	60	27.6	28.4	30.8	137.8	135.4	138.4	95.1	85.4	103.2	7.3	8.4	7.7	6.4	6.8	6.2	1.8	2.3	2.4	0.8	1.1	1.2	3.5	4.2	3.1	42.3	37.7	36.6	398.5	459	398.3	4.2	4.1	4.1	19	15.9	16.8
P064	CON	女	59	28.6	25.5	25	142.9	151.9	140	108.2	85.6	98	7.9	7.6	6.2	7.1	7	6.2	1.5	1.7	2.7	1.4	1.4	0.8	2.9	3.9	3.8	40.2	29.2	37.3	381.1	329.8	340.3	5	2.6	2.3	18.4	17.8	11.5
P065	CON	男	52	27.9	28.3	30.2	148.1	155.6	139	91.5	89.7	75.2	7.1	6.8	6.5	7.1	7	5.7	1.3	2.8	2.2	1.2	1	1.1	4.1	4.3	4.6	28.6	10.6	32.7	464.7	483.1	395.1	2.9	3.1	3.2	11.9	13.9	13.5
P066	CON	女	58	25.7	28.8	27.9	159.8	127.4	136.3	92	85.7	79.7	8.1	7.1	5	7	7.1	7.9	2.5	2.1	1.5	1.1	0.9	1.2	4.5	3.9	4.8	39.3	33.7	49.8	409.1	360.1	435.5	3.7	3.2	3.4	15	15.2	12.6
P067	CON	男	52	30.3	26.2	25.9	153.6	133.2	145.4	86.3	84.3	84.9	6.5	8.2	6.4	6.4	7.9	5.8	1.6	2.2	2.3	1	1	1.1	3.7	3.5	4	43	49.2	18.9	381	397	362.1	4	4.5	4	15.8	15.2	13.5
P068	CON	女	60	29.5	28.3	28.8	143.4	124.6	136.6	83.2	90.9	90.1	8.4	6.2	4.5	6.3	7.1	6.2	1.1	1.7	1.8	0.8	1.3	0.8	4.3	4	4	42.5	44.3	26.6	499.3	435	362.5	4	4.4	4.1	15.5	13	13.7
P069	CON	男	57	29.6	28.1	28.3	144.8	142.3	147.6	96.6	88	94	9.3	7.4	5.3	6.8	6.6	6.2	2.4	2	1.8	0.9	0.9	1	4.6	3.2	2.8	46.9	44.7	33.9	505.2	539.7	440.5	3.6	2.3	2.7	17.3	15.3	13.7
P070	CON	女	62	26.2	25.7	26.7	135	152.2	144.4	83.2	102	84.1	6.6	6.6	7.7	7.6	7.5	7.3	3.4	1.8	2.4	1.2	0.8	0.9	4.5	3.9	3.4	42.1	47.4	18.5	384	606.6	417	4.2	3.6	3.5	21.7	9.8	19.2
P071	CON	男	59	30.8	28.7	28	144.8	160	142.5	90.6	68.8	91.4	6.6	7	7.7	7.2	7.6	6.5	2.2	2.1	2.7	1.4	0.9	0.7	4.6	3.8	3.3	38.5	35.9	33.1	308	456.4	421.9	4	2.8	3.9	20.3	14	11.5
P072	CON	女	57	25.2	29.1	27.1	142.1	145.7	135.8	86.2	98.7	83.9	8.5	8.3	7.3	6.5	5.9	7.6	2.6	3.1	2.1	1.3	0.8	1	4.2	3.7	3.4	45.7	37	51.5	480.5	409	374.4	2.3	2.2	4.9	10.8	14.9	16.8
P073	CON	男	53	29.2	30.2	28.1	148.2	161.3	139.1	93.8	100	85	8.6	7.2	5.9	7.3	7.2	6.2	2.2	1.5	2.3	0.9	1	0.7	3.8	3.7	3.6	34.7	28.8	35.1	378.9	452.1	406.1	4.4	3.3	4.1	18.5	15	20.8
P074	CON	女	59	32.4	30.1	29.2	136.7	131.2	152.5	92.7	73.4	78.6	6.5	7	6.9	4.8	7.3	6.9	2.2	1.4	3	0.8	1.3	1.1	3	2.9	3.5	26.2	31.8	37.2	467.4	473.3	364.4	4.4	3.2	4.2	21.3	15	13.8
P075	CON	男	57	26	25.2	31.1	150.2	128	149.9	98.3	87.3	82.5	6.6	5.6	6.9	7.6	6.6	6.1	2.7	2.9	2.2	1	1.1	0.8	3.7	3.5	2.7	33.4	41.2	22.3	301.8	400.8	473.3	2.7	5.9	3.5	17.5	15.8	13
P076	CON	女	45	26.9	26.1	25.4	160.3	144.4	135.1	85.9	87	79.1	6.7	7.7	5.7	5.6	7.8	8.2	2.1	2.1	3.4	0.6	0.9	0.9	3.4	3.8	4.1	27.6	47	28.7	473.6	527.7	482	3.5	3.9	4.8	20.4	17.9	15
P077	CON	男	51	28.2	29	32.2	143.9	148.8	145.9	87.8	78.7	82.1	5.7	7.6	8.4	6.5	6.7	5.9	2.3	1.9	2.4	1.1	0.9	1	4.9	3.9	3.2	28.2	33.6	31.1	347.3	433.8	309.1	4.2	2.1	3.8	24	19.5	20.6
P078	CON	女	53	27	29	24	149	144.7	152.4	82.2	83.8	98.3	6.1	9.2	7.8	6	6.9	6.9	2.4	2.7	1.2	1	0.7	0.8	3.7	3.3	3.8	33.6	30.5	31.7	463.8	449.9	364.1	3.3	2.9	2.5	20.1	13.4	16.7
